# Supplementary material for: An engineered high affinity Fbs1 carbohydrate binding protein for selective capture of N-glycans and N-glycopeptides
Source: PubMed Central journal article supplement (PMC5457524; doi:10.1038/ncomms15487), 2017-05-23
Supplement: ncomms15487-s1.pdf [file ncomms15487-s1.pdf]

1

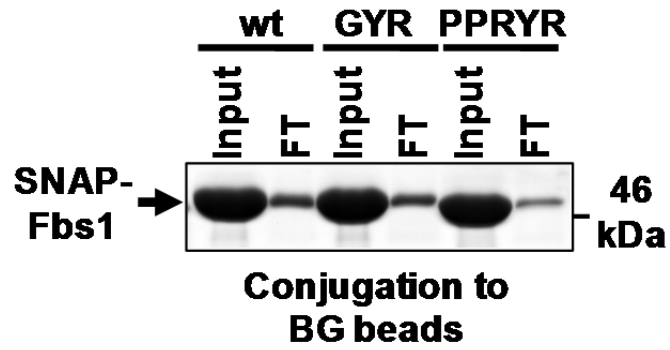

2

3

4 **Supplementary Figure 1. Conjugation of wt, GYR or PPRYR Fbs1 protein to BG beads. FT**  
5 (flow-through) denotes protein that was not conjugated to the BG beads. The conjugation  
6 efficiency can be estimated by the protein amount in the input lane minus the FT.

7

8

9

10

11

12

13

14

15

16

17

18

19

20

21

22

23

24

25

26

27

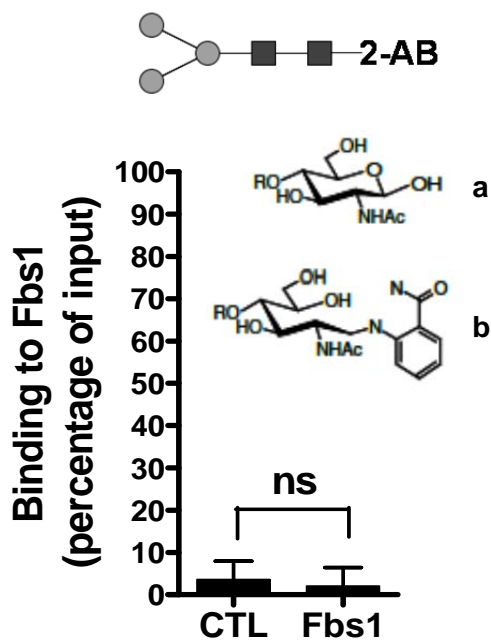

28

29

30

31 **Supplementary Figure 2. 2-aminobenzamide (2-AB) fluorophore labeling at the reducing**  
32 **end of M3N2 abolishes binding by Fbs1 beads.** M3N2-2-AB (structure shown at top) was  
33 incubated with Fbs1 beads. BG beads conjugated with  $\beta$ -lactamase were used as control beads  
34 (CTL). The binding affinity was measured as fluorescence retained on the beads: percentage of  
35 input equals fluorescence on the beads/input fluorescence. Chemical structures of the GlcNAc  
36 at the reducing end with or without 2-AB labeling are shown as "a" and "b". ns denotes no  
37 statistical significant difference (p value 0.989, >0.05, t-test, two-tailed). Results represent the  
38 mean  $\pm$  s.e.m. of four replicates.

39

40

41

42

43

44

45

46  
47

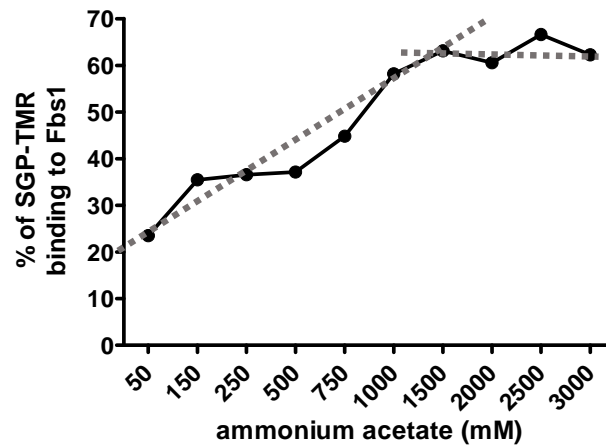

48  
49  
50  
51  
52  
53  
54  
55  
56  
57  
58  
59  
60  
61  
62  
63  
64  
65  
66  
67  
68  
69

**Supplementary Figure 3. Fbs1 binding to N-glycopeptides in high salt.** The effect of increasing amount of salt (50-3000 mM ammonium acetate pH7.5) on binding of Fbs1 to SGP-TMR. Sloped dashed line indicates that SGP-TMR binding increases with increasing salt concentration (50 to 1500 mM), while the level dashed line indicates SGP-TMR binding reaches the maximum at 1500 to 3000 mM.

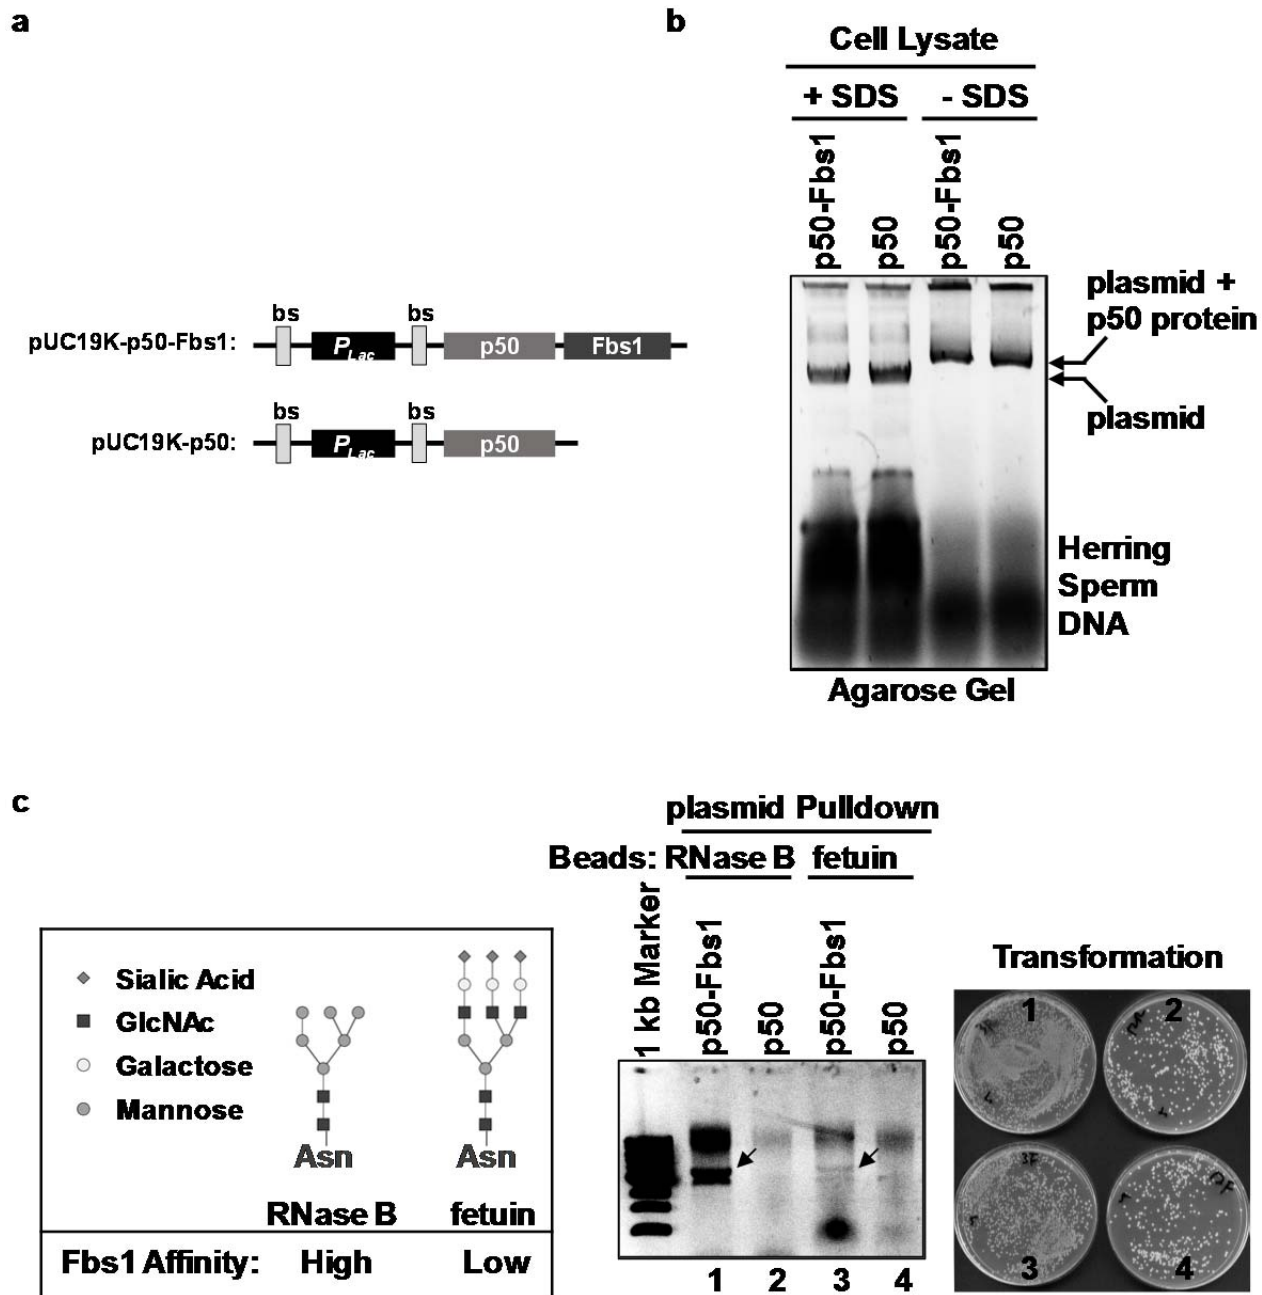

70

71

72 **Supplementary Figure 4. The Fbs1 plasmid display system.**

73 a. Illustration of the Fbs1 plasmid display constructs. pUC19K-p50-Fbs1 encoding the p50-  
 74 Fbs1 fusion protein was used for Fbs1 display. pUC19K-p50 encoding p50 only was used  
 75 as a control plasmid. Both plasmids contain p50 DNA binding sequences.  $P_{Lac}$  denotes the  
 76 lactose-inducible promoter. bs denotes the p50 DNA binding site (5'-GGGAATTC-3').

77 b. p50-Fbs1 fusion protein binds to the encoding plasmid to link genotype and phenotype. *E.*  
78 *coli* cells harboring pUC19K-p50-Fbs1 or pUC19K-p50 were lysed using the spheroplast  
79 method described in Materials and Methods section. The cell lysates mixed with DNA  
80 loading buffer with or without SDS were analyzed by agarose gel electrophoresis. SDS was  
81 used to disrupt the interaction between the encoding plasmids and p50 or p50-Fbs1  
82 proteins. The mobility shift (compare +/- SDS) indicates p50 protein or p50-Fbs1 fusion  
83 protein stably binds to their encoding plasmids. Herring sperm DNA is present due to  
84 carryover from the lysis buffer.

85 c. Left panel shows the glycan structures of RNase B and fetuin, and relative affinity to Fbs1.  
86 p50-Fbs1 protein and encoding plasmid DNA complexes were pulled down by either RNase  
87 B or fetuin beads. *E. coli* harboring pUC19K-p50-Fbs1 or pUC19K-p50 (as a control) were  
88 lysed using the spheroplast method described in the Materials and Methods section. The  
89 cell lysates were then subjected to RNase B and fetuin bead pulldown. The bound and  
90 eluted plasmid DNA was analyzed by agarose gel electrophoresis (middle panel). The  
91 bound and eluted pUC19K-p50-Fbs1 plasmid is indicated by arrows. The amount of isolated  
92 plasmid roughly correlates to the affinity of wt Fbs1 for the respective target proteins. The  
93 amount of isolated plasmid DNA was also confirmed by transformation into *E. coli*  
94 competent cells (right panel). The relative number of transformants (right panel) indicates  
95 that each in vitro selection/ transformation cycle may function to enrich for high affinity Fbs1  
96 variants.

97  
98  
99  
100  
101  
102  
103  
104  
105  
106  
107  
108  
109  
110

**a**

**Amino acid sequence of human Fbs1 SBD:**

C<sub>92</sub>QQEGLVPEGGVEEERDHWQQFYFLSKRRRNLLRNPCGEEDLEGWCDV  
 EHGGDGWRVEELPGD<sub>154</sub>**S**<sub>155</sub>**G**<sub>156</sub>VEFTHDESVKKYFASS**F**<sub>173</sub>**E**<sub>174</sub>WC  
 RKAQVIDLQAEGYWEELDDTTQPAMVKDWYSG**R**<sub>210</sub>**S**<sub>211</sub>**D**<sub>213</sub>**G**<sub>214</sub>CLY  
 ELTVKLLSEHENMLAEFSSGQVAVPQDSDGGGWMEISHTFTDYGPVRFVR  
 FEHGGQDSVYWK<sub>280</sub>**G**<sub>281</sub>**W****F**<sub>283</sub>GARVTNSSVWVPEP<sub>296</sub>

**b**

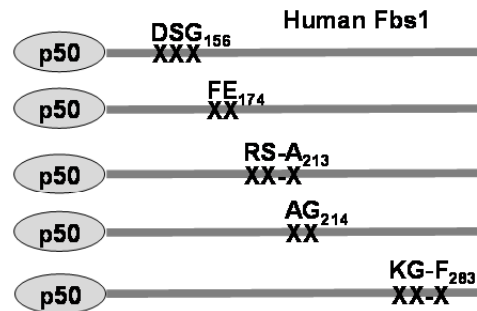

**c**

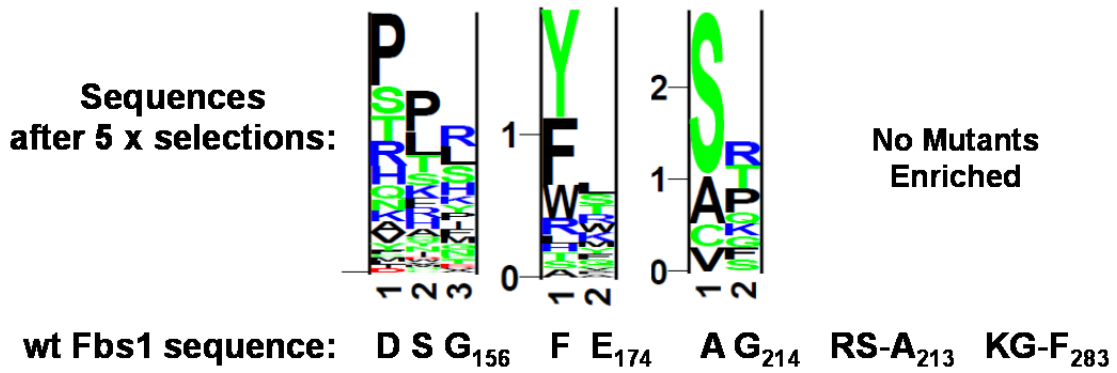

111

112

113 **Supplementary Figure 5. Primary selection of Fbs1 mutants with higher affinity to fetuin**

114 **by plasmid display.**

115 a. Amino acid sequence of human Fbs1 sugar binding domain (SBD). The amino acid residues  
116 that were subjected to saturation mutagenesis are in bold. The numbering of amino acid  
117 residues is according to full-length human Fbs1.

118 b. Illustration of each saturation mutagenesis sub-library. The amino acid sequences of wt  
119 human Fbs1 are shown above the p50-Fbs1 fusion proteins, and “x” indicates codon  
120 positions subjected to mutagenesis. The last amino acid in each position is numbered  
121 according to the full-length wt human Fbs1.

122 c. Amino acid sequence logo indicating potential Fbs1 mutants with higher affinity to complex  
123 N-glycans. After 5 cycles of p50-Fbs1 plasmid display selection against fetuin beads, 121  
124 clones were sequenced, and the amino acids in each mutagenesis position were plotted as  
125 a sequence logo to indicate the amino acid distribution frequency. The amino acid  
126 sequences in wt Fbs1 are shown under the corresponding logos.

127

128

129

130

131

132

133

134

135

136

137

138

139

140

141

142

143

144

145

146

147

148

149

150

151

152

153

154

155

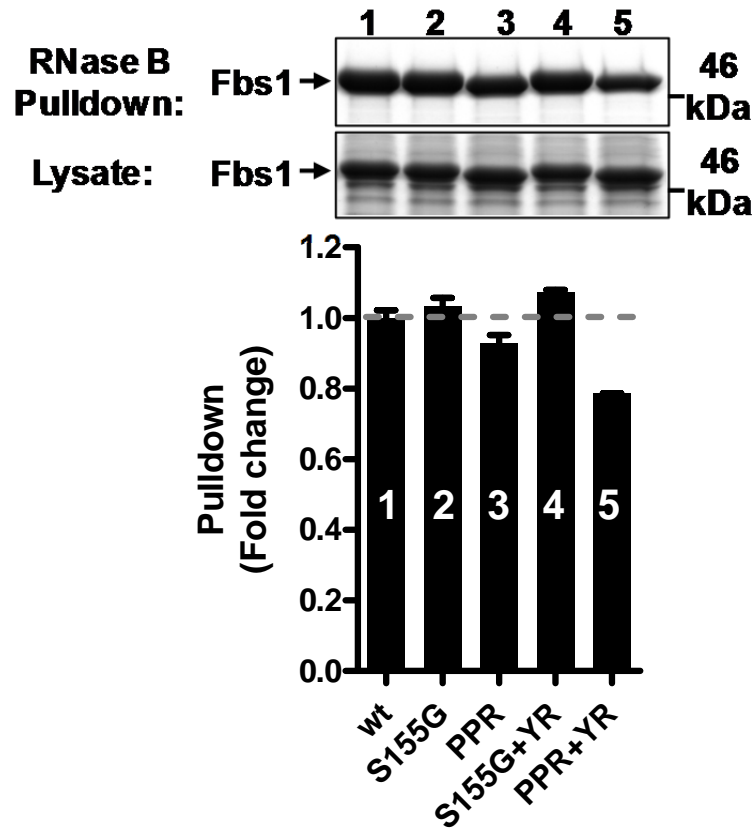

156  
 157  
 158  
 159  
 160  
 161  
 162  
 163  
 164  
 165  
 166  
 167  
 168  
 169  
 170

**Supplementary Figure 6. Evaluation of Fbs1 variant binding affinity to RNase B.** *E. coli* cell lysates containing the same amount of wt Fbs1 or Fbs1 variant proteins were subjected to an RNase B bead pulldown assay. The bound Fbs1 was analyzed by SDS-PAGE (upper panels) and quantified by ImageJ. The amount of bound Fbs1 variant protein was standardized to that of bound wt Fbs1 and the fold change was calculated (bar graph). The relative affinity to RNase B of each Fbs1 variant is indicated by the fold change. A representative SDS-PAGE gel is shown from two experiments.



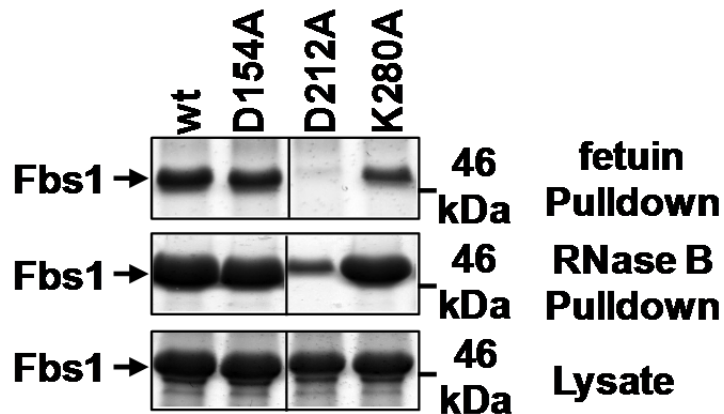

171

172 **Supplementary Figure 7. Representative data: alanine scanning of Fbs1 glycan binding**  
 173 **site.** *E. coli* cell lysates containing wt, D154A, D212A or K280A Fbs1 protein were subjected to  
 174 a fetuin or RNase B pulldown assay. The bound Fbs1 proteins were analyzed by SDS-PAGE.  
 175 The amino acid numbering is according to full-length human Fbs1. A representative SDS-PAGE  
 176 gel is shown from two experiments.

177

178

179

180

181

182

183

184

185

186

187

188

189

190

191

192

193

194

195  
196  
197

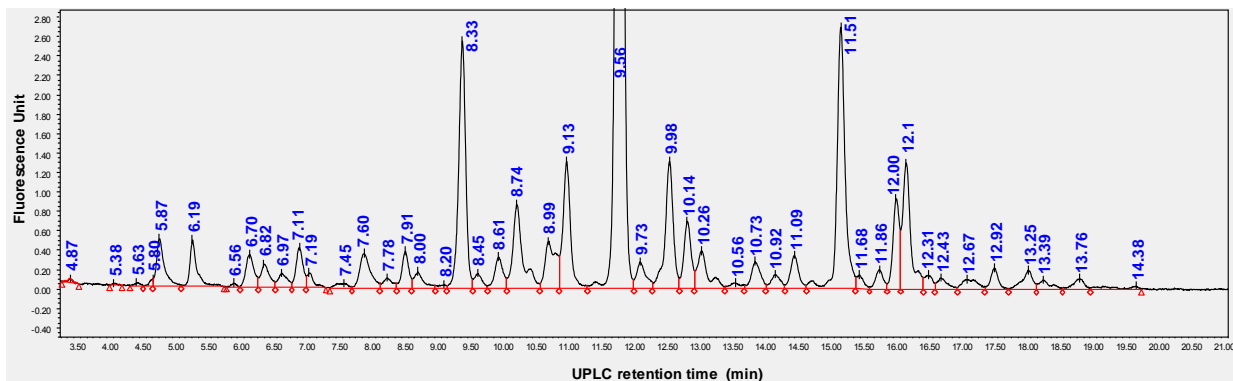

198  
199

200 **Supplementary Figure 8. Glucose unit (GU) assignment.** GU values are assigned to each  
201 peak in the 2-AB-labeled N-glycan profile from the pre-enrichment sample of HSA-depleted  
202 human serum using a 2-AB-labeled glucose homopolymer standard.

203  
204  
205  
206  
207  
208  
209  
210  
211  
212  
213  
214  
215  
216  
217  
218  
219  
220

221  
222 atgggcagcagc **caccaccatcatcaccat**ggcgacaaagattgcgaaatgaaacgtaccaccctggatagcccgtgggcaaa  
223 ctggaactgagcggctgcgaacagggcctgcatgaaattaaactgctgggtaaaggcaccagcgcggccgatgcggtgaagtcc  
224 ggccccggccgctgctgggtggtccggaaccgctgatgcaggcgaccgctggctgaacgcgtatcttcatcagccggaagcga  
225 ttgaagaattccggtccggcgtgcatcatccggtgttcagcaggagagctttaccctcaggtgctgtggaaactgctgaaagtgt  
226 taaatttggcgaagtgattagctatcagcagctggcggccctggcgggtaatccggcggccaccgcccgttaaaccgctgag  
227 cggtaaccggtgccgattctgattccgtgccatcgtgtggttagctctagcggctgcggttgccggtatgaaggtggtctggcggta  
228 agagtggctgctggccatgaaggtcatcgtctgggtaaaccgggtctgggaacctgcagctataggcgcgccaggatccggtctgg  
229 ctct **cctgcaggtgtcaacaagaaggctggtcccggaagggtggtggaagaagaacgcgatcattggcaacagtttactttctga**  
230 **gcaaacgccgtcgtaacctgctgcgcaatccgtgcgggtgaagaagatctggaaggctggtgtgacgtcgaacatggcggatggtt**  
231 **ggcgtggtgaagaactgccgggtgacGGTggcgtggaatttaccacgatgaaagcgtgaaaaaatatttgcgagctctTATC**  
232 **GTtgggtccgcaaagcgcaagtattgacctgcaagccgaaggctactgggaagaactgctggataccacgcagccggcgtatcg**  
233 **tggttaaagactggtattcaggtcgttcggatgccgctgtctgtacgaactgacgggttaaactgctgagcgaacatgaaaacgtcctg**  
234 **gcagaatttagtccggtcaggtcgtgtccgcaagatagtacggcgggtggatggaaattcacataccttcacggattatggt**  
235 **ccgggcgttcgtttgtccgctcgaacacgggtggccaagattccgttactgaaaggctggttgggtgccgctgacgaactcaagc**  
236 **gtgtgggtggaaccgtaa**

237

238

239

240 **Supplementary Figure 9. DNA sequence of SNAP-Fbs1 GYR open reading frame.** DNA  
241 sequences encoding 6his tag, SNAP tag, and Fbs1 are highlighted in yellow, gray, and blue,  
242 respectively. The GYR mutations are in bold/uppercase.

243

244

245

246

247

248

249

250

251

252
